# Supplementary material for: Catalytic deep eutectic solvents for highly efficient conversion of cellulose to gluconic acid with gluconic acid self-precipitation separation
Source: Royal Society of Chemistry journal article supplement (doi:10.1039/c8cc03798a), 2018-01-01
Supplement: c8cc03798a1.pdf [file c8cc03798a1.pdf]

## Electronic Supplementary Information

### Catalytic Deep Eutectic Solvents for Highly Efficient Conversion of Cellulose to Gluconic Acid with Gluconic Acid Self-Precipitation Separation

Feijie Liu<sup>1</sup>, Zhimin Xue<sup>2\*</sup>, Xinhui Zhao<sup>1</sup>, Hongyu Mou<sup>1</sup>, Jing He<sup>3</sup>, Tiancheng Mu<sup>1\*</sup>

<sup>1</sup> Department of Chemistry, Renmin University of China, Beijing 100872, China, E-mail: tcmu@ruc.edu.cn

<sup>2</sup> Beijing Key Laboratory of Lignocellulosic Chemistry, College of Materials Science and Technology, Beijing Forestry University, Beijing 100083, China, Email: zmxue@bjfu.edu.cn

<sup>3</sup> State Key Laboratory of Chemical Resource Engineering, Beijing University of Chemical Technology, Beijing 100029, China

#### Table of the contents:

1. Experimental section
2. Supplementary Figures
3. Supplementary Tables

## Experimental Section

### Materials and Reagents

Hydrogen bond acceptor (HBA) ferric trichloride hexahydrate ( $\text{FeCl}_3 \cdot 6\text{H}_2\text{O}$ ) ( $\geq 99\%$ ) and hydrogen bond donor (HBDs) urea, ethylene glycol, glycerol, malonic acid, glycine, xylitol, and pentaerythritol with purities higher than 99% were purchased from Sinopharm Chemical Reagent Co., Ltd. L-Alanine, L-Serine ( $> 99\%$ ) were provided by J&K. Glucose ( $> 98.0\%$ ) and Gluconic acid (contains Gluconolactone, 45%-50% in water) were obtained from TCI. All chemicals were used directly without further purification.

### Instruments and Analytical methods

The IR spectra were obtained by coupling of the attenuated total reflection (ATR) equipment with the FTIR spectrometer (Prestige 21, Shimadzu) in the range of 400 to 4000  $\text{cm}^{-1}$ . Differential scanning calorimetry (DSC) was performed using a Q2000 DSC (TA Instruments, USA) system at a heating rate of 10  $^\circ\text{C min}^{-1}$ . All CDESs were run in aluminium pans in a sealed furnace and were cooled to -100  $^\circ\text{C}$  before heating up to room temperature. The viscosity ( $\eta$ ) of CDESs was measured using an Anton Paar DMA 5000 M five times and the average value was reported. The conductivity of the CDESs was measured by using a conductivity meter (DDS-307A, Shanghai INESA Scientific Instrument Co., Ltd, China) five times at 298.15 K. The deviation of the equipment was less than  $\pm 0.5\%$ . After obtaining the product, we used ethyl acetate to wash product. And the residual Fe present in the washed gluconic acid was analysed by Agilent Technologies 700 Series ICP-OES. The yield and conversion were measured by high-performance liquid chromatography (HPLC) as described below.

The concentration of glucose in the reaction system was quantitatively analysed by a HPLC with

$$\text{Conversion} = \frac{\text{moles of carbon in substrate consumed}}{\text{initial moles of carbon in substrate}}$$

$$\text{Product yield} = \frac{\text{moles of carbon in gluconic acid}}{\text{initial moles carbon in substrate}}$$

Hypersil NH<sub>2</sub> 5 μm column at 30 °C, Shimadzu LC-20AT pump, Shimadzu RID-10A detectors at room temperature, and water was used as flowing phase at 0.6 mL·min<sup>-1</sup>. The product gluconic acid was quantitatively analyzed by using a HPLC system with a SB-C18 column (4.6 × 250 mm) and detected using a UV detector at a wavelength of 210 nm at 25 °C. Methanol and 0.1% acetic acid (5:5) were used as eluent at a flow rate of 1 mL/min. The concentration of product was determined by comparison to the calibration curves created by external standards. The conversion of substrate and product yield were calculated using the following formula:

### **CDESs preparation**

The Fe-based CDESs were prepared by simply mixing FeCl<sub>3</sub>·6H<sub>2</sub>O and nine HBDs in different molar ratio under mild heating (40 °C). After a while, clear dark-brown homogenous liquids can be observed. All these DESs are stable at room temperature and reaction conditions.

### **Catalytic conversion glucose and cellulose**

In a typical experiment, known quality of glucose or cellulose and 10 mL CDESs were loaded into a glass vial and heated in an oil with controlled temperature for a certain time. Then the vial was immediately placed in an ice-water bath to stop the reaction. The solid precipitation (products) could be found at the bottom of the glass vial, while the unreacted glucose could be found in CDESs. The solid product was washed with ethyl acetate and then dried in the oven. In final washing step of the solid, we used about 20 mL ethyl acetate to wash 9-10 times in total. Each time we use about 2 mL of ethyl acetate to clean by ultrasound followed with centrifuging. The final amount of residual Fe present in the washed gluconic acid was analysed by ICP-OES. For example, the residual Fe was about 1% (w/w) in FeCl<sub>3</sub>·6H<sub>2</sub>O/ethylene glycol reaction system. The solid product and upper solvent were analyzed by high-performance liquid chromatography (HPLC) to calculate the yield and conversion rate respectively.

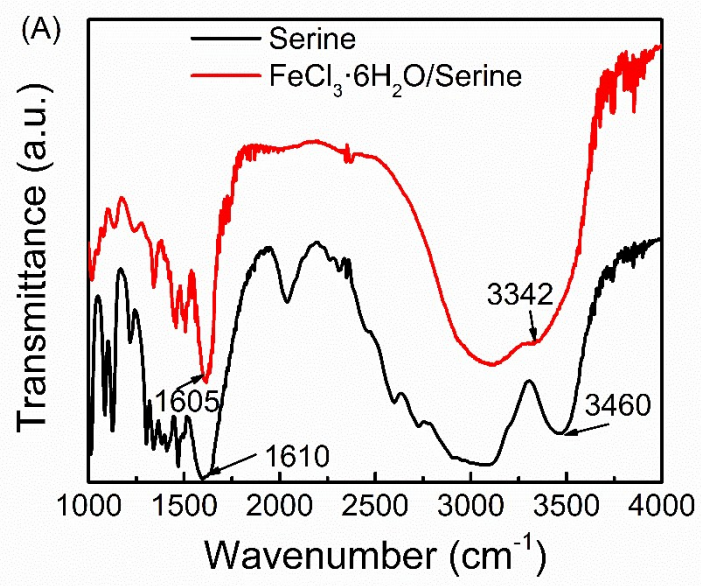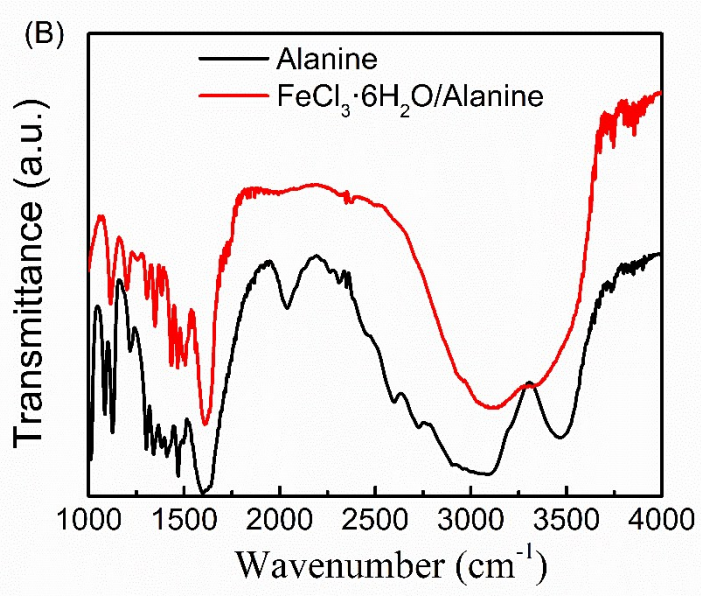

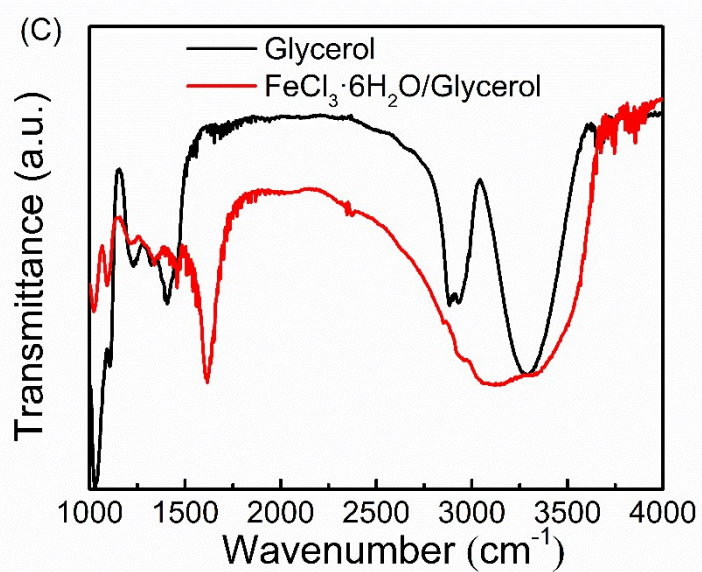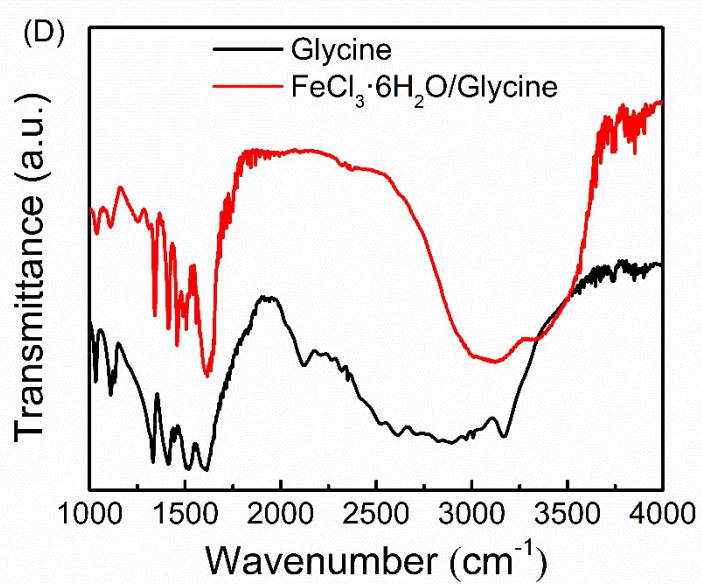

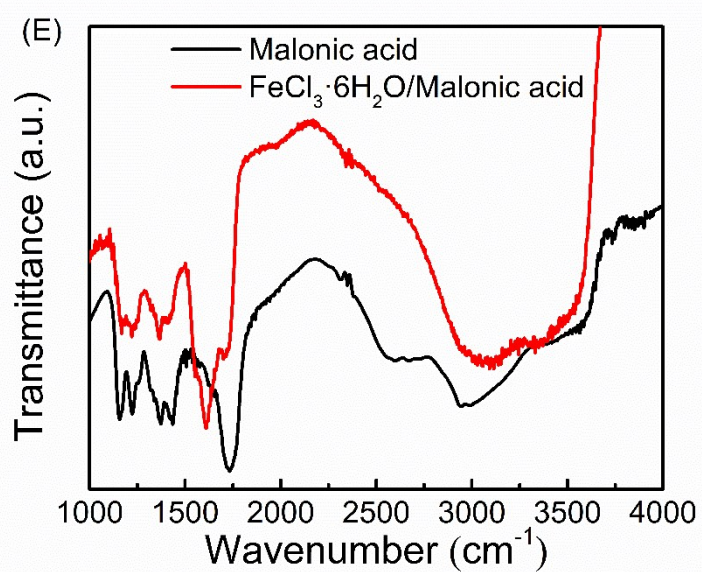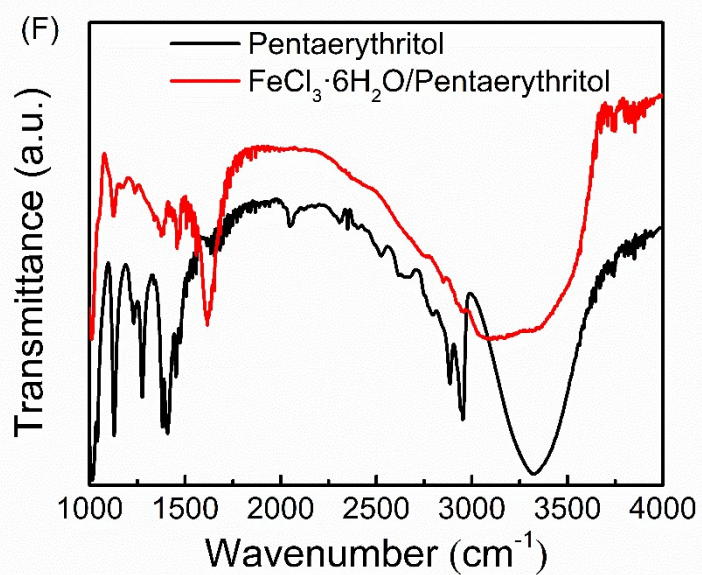

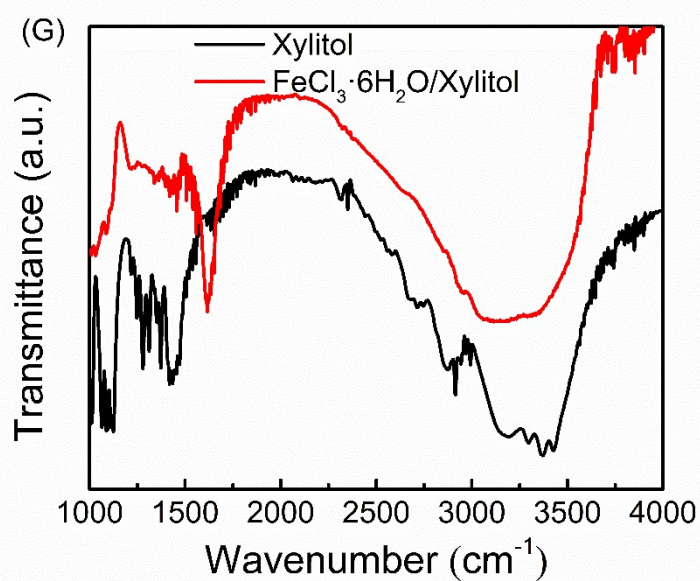

**Fig. S1.** FTIR of FeCl<sub>3</sub>·6H<sub>2</sub>O and different HBDs. (A) FTIR spectra of FeCl<sub>3</sub>·6H<sub>2</sub>O/serine; (B) FeCl<sub>3</sub>·6H<sub>2</sub>O/alanine; (C) FeCl<sub>3</sub>·6H<sub>2</sub>O/glycerol; (D) FeCl<sub>3</sub>·6H<sub>2</sub>O/glycine; (E) FeCl<sub>3</sub>·6H<sub>2</sub>O/malonic acid; (F) FeCl<sub>3</sub>·6H<sub>2</sub>O/pentaerythritol; (G) FeCl<sub>3</sub>·6H<sub>2</sub>O/xylitol

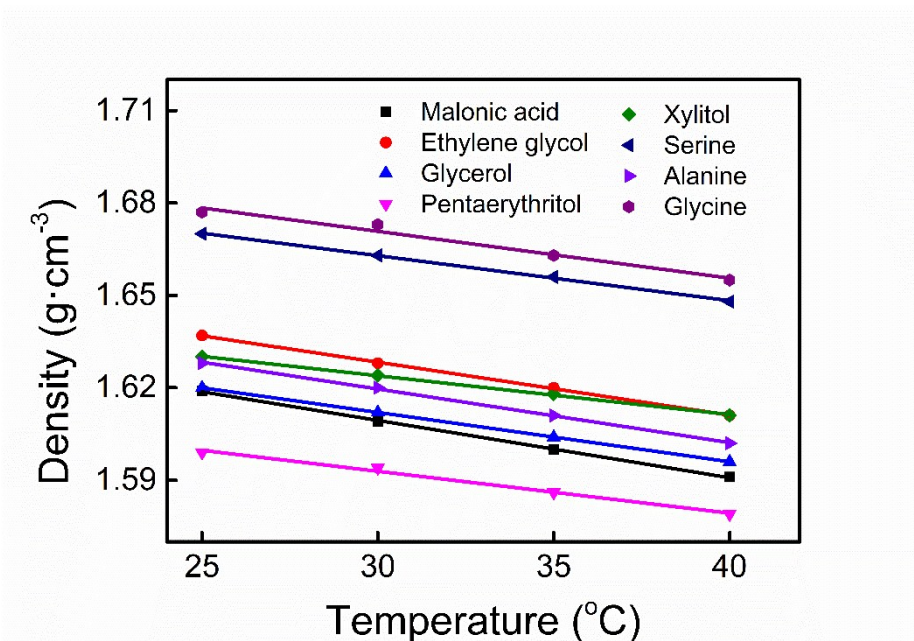

**Fig. S2.** The densities of all CDESs ( $\text{FeCl}_3 \cdot 6\text{H}_2\text{O}/\text{HBDs}$ ) as a function of temperature.

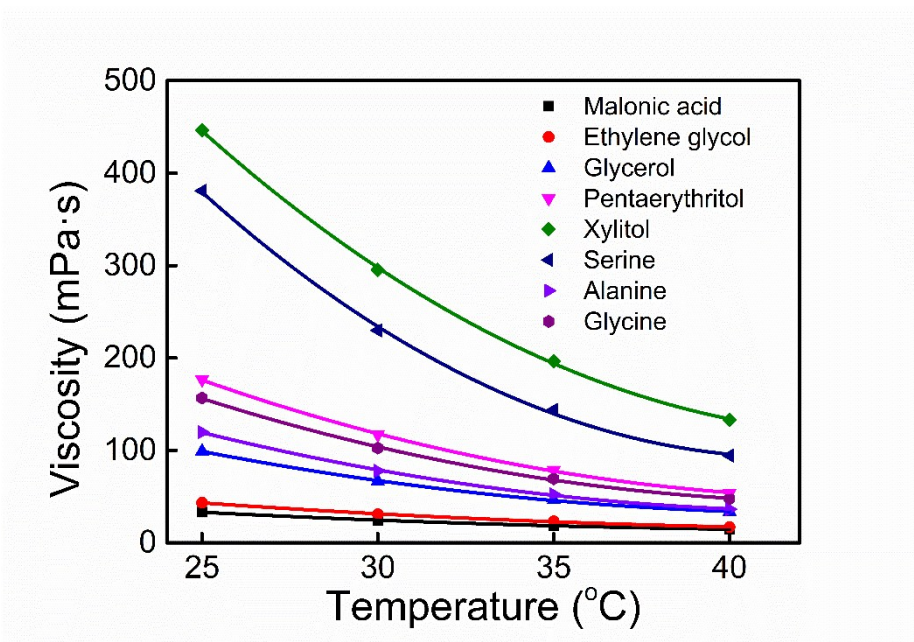

**Fig. S3.** The viscosities of all CDESs ( $\text{FeCl}_3 \cdot 6\text{H}_2\text{O}/\text{HBDs}$ ) as a function of temperature.



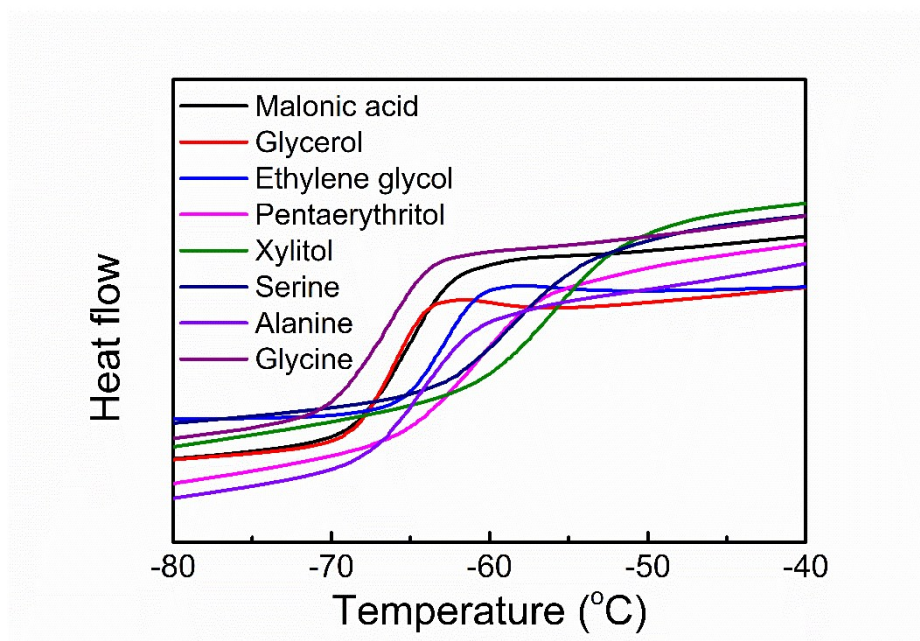

**Fig. S4.** Glass transition temperature ( $T_g$ ) of all CDESs ( $\text{FeCl}_3 \cdot 6\text{H}_2\text{O}/\text{HBDS}$ ) analyzed by differential scanning calorimetry (DSC).

**Table S1.** Physicochemical properties (viscosity, density, conductivity) of DESs at 25°C.

| Entry | HBD             | FeCl <sub>3</sub> ·6H <sub>2</sub> O/HBD<br>molar ratio | Viscosity<br>(mPa·s) | Density<br>(g·cm <sup>-3</sup> ) | Conductivity<br>(mS·cm <sup>-1</sup> ) | T <sub>g</sub><br>(°C) |
|-------|-----------------|---------------------------------------------------------|----------------------|----------------------------------|----------------------------------------|------------------------|
| 1     | ethylene glycol | 2:1                                                     | 43.37                | 1.605                            | 45.4                                   | -64                    |
| 2     | glycerol        | 3:1                                                     | 99.16                | 1.637                            | 26.8                                   | -66                    |
| 3     | malonic acid    | 2:1                                                     | 33.16                | 1.619                            | 108.3                                  | -63                    |
| 4     | pentaerythritol | 2:1                                                     | 176.49               | 1.599                            | 24.5                                   | -60                    |
| 5     | xylitol         | 2:1                                                     | 446.54               | 1.630                            | 10.1                                   | -55                    |
| 6     | serine          | 2:1                                                     | 380.89               | 1.670                            | 19.4                                   | -56                    |
| 7     | alanine         | 2:1                                                     | 119.75               | 1.628                            | 37.4                                   | -63                    |
| 8     | glycine         | 2:1                                                     | 156.62               | 1.677                            | 43.9                                   | -65                    |

**Table S2.** The pH of CDESs.

| HBDs            | pH    | HBDs    | pH    |
|-----------------|-------|---------|-------|
| Ethylene glycol | -1.09 | Serine  | -1.62 |
| Glycerol        | -1.17 | Alanine | -1.59 |
| Malnoic acid    | -1.78 | Glycine | -1.50 |
| Pentaerythritol | -1.14 | Xylitol | -1.22 |

**Table S3.** The effect of temperature on product yield in the conversion of cellulose.

| Cellulose conc.<br>(w/v, %) | Time<br>(minutes) | Temperature<br>(°C) | Gluconic acid<br>Yield (%) |
|-----------------------------|-------------------|---------------------|----------------------------|
| 5.0                         | 60                | 90                  | 12.8                       |
| 5.0                         | 60                | 100                 | 19.6                       |
| 5.0                         | 60                | 110                 | 35.4                       |
| 5.0                         | 60                | 120                 | 52.7                       |
| 5.0                         | 60                | 130                 | 39.5                       |

**Table S4.** Conversion of cellulose in FeCl<sub>3</sub>·6H<sub>2</sub>O/ethylene glycol at 120°C in 60 minutes with different concentrations of cellulose.

| Cellulose conc.<br>(w/v, %) | Time<br>(minutes) | Temperature<br>(°C) | Cellulose<br>conversion (%) | Gluconic acid<br>Yield (%) |
|-----------------------------|-------------------|---------------------|-----------------------------|----------------------------|
| 2.5                         | 60                | 120                 | 100                         | 24.5                       |
| 5.0                         | 60                | 120                 | 100                         | 52.7                       |
| 7.5                         | 60                | 120                 | 100                         | 30.7                       |
| 10.0                        | 60                | 120                 | 100                         | 21.6                       |
